# Supplementary material for: Gimatecan exerts potent antitumor activity against gastric cancer in vitro and in vivo via AKT and MAPK signaling pathways
Source: Springer Nature journal article supplement (doi:10.1186/s12967-017-1360-z), 2017-12-01

**A**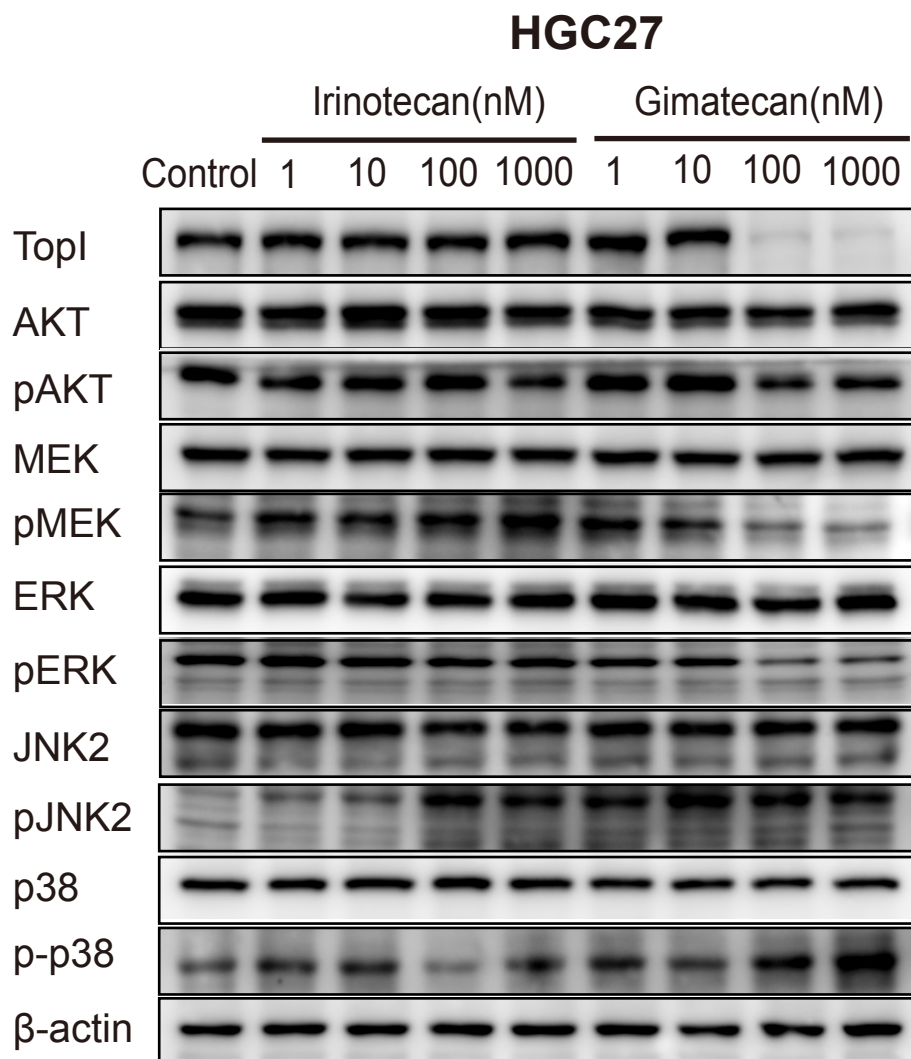**B**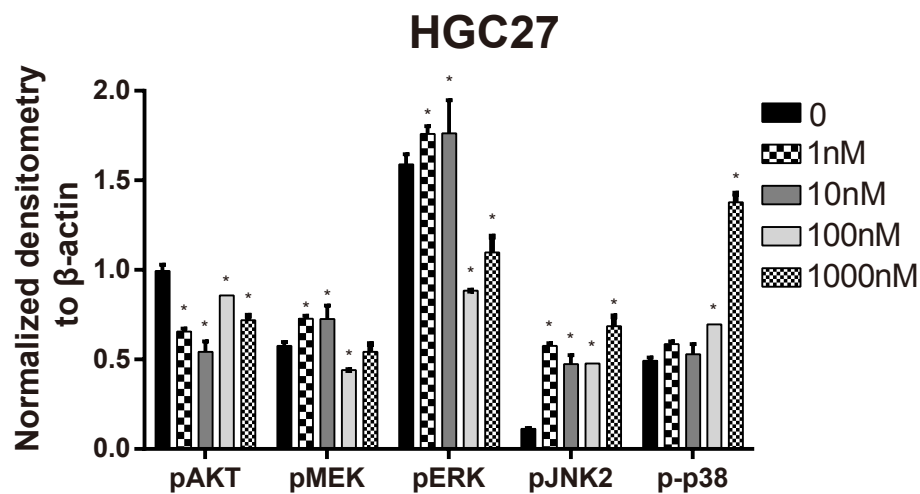

Supplement: MOESM3 [file 15304964]
